# Supplementary material for: Effects of Self-Care for Older PErsons (SCOPE) on Functional and Physiological Measures: A Cluster Randomized Controlled Trial
Source: MDPI journal article supplement (doi:10.3390/jcm9030885), 2020-03-24
Supplement: s1 [file s1]

Figure S1. CONSORT 2010 Flow Diagram for SCOPE (individual measures).

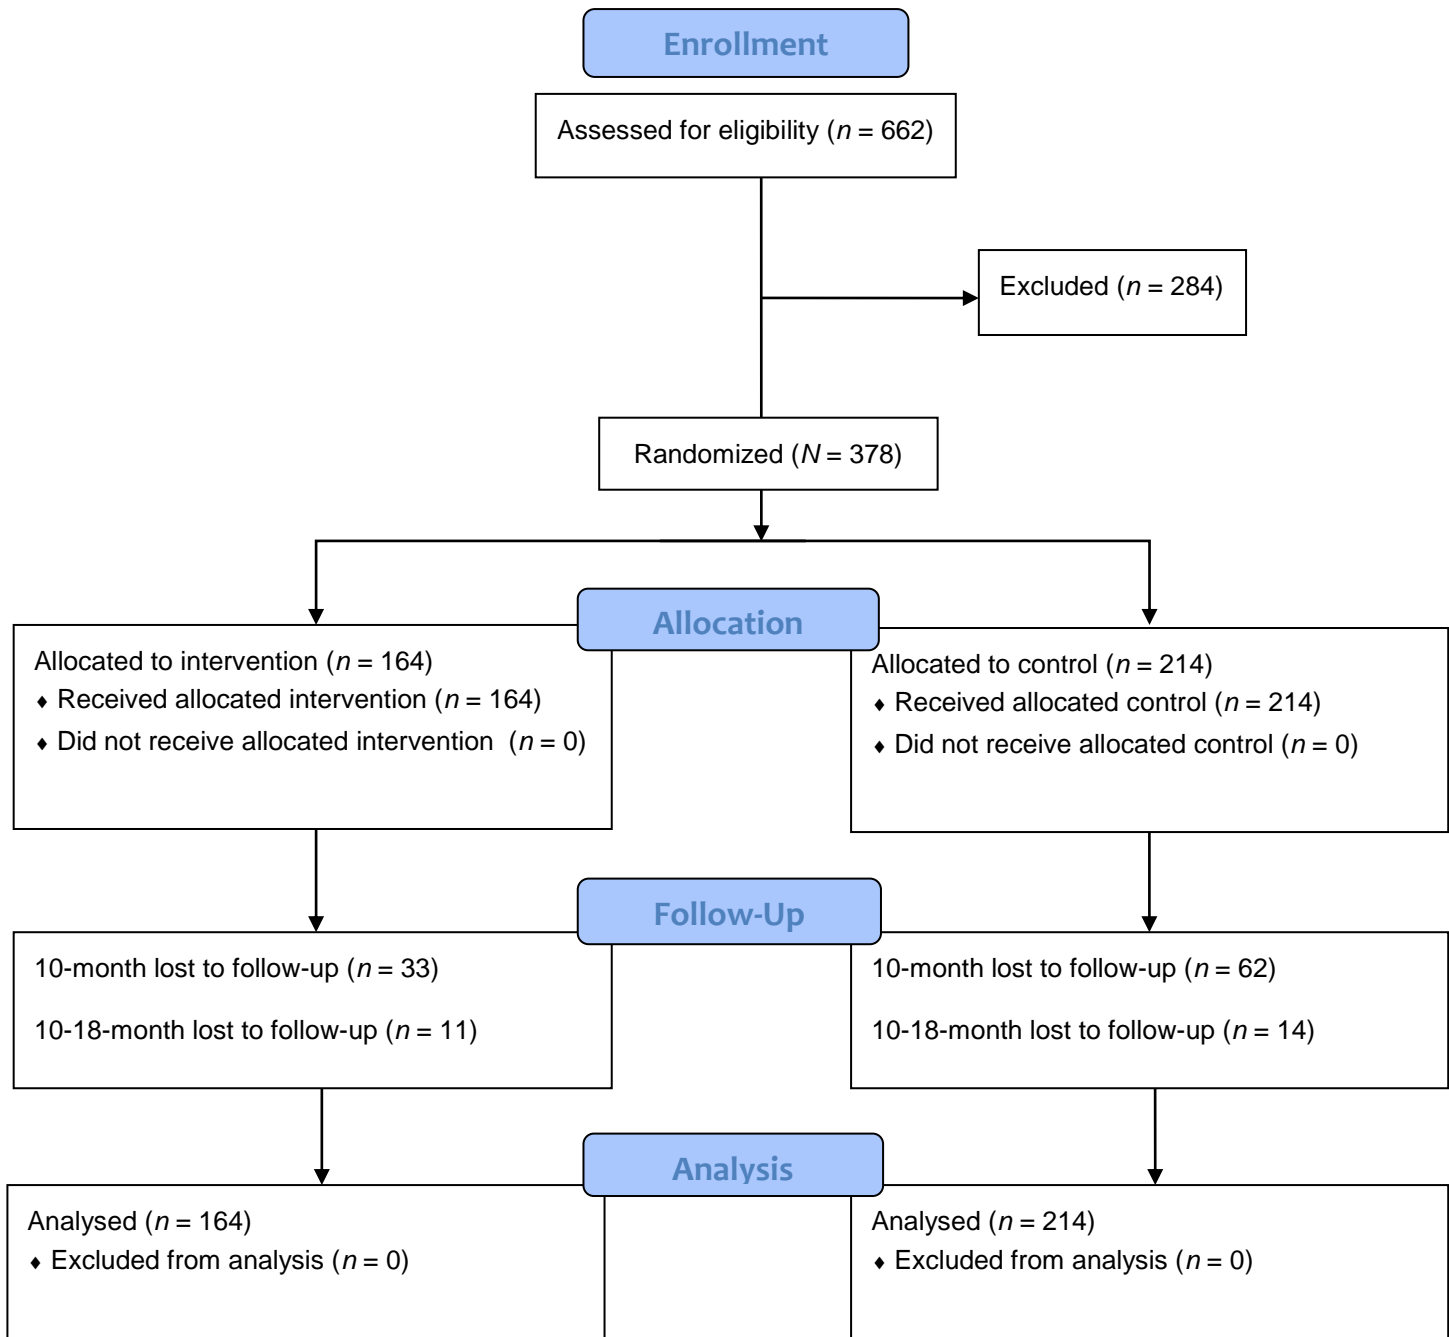

**Table S1.** Number of participants with each of the chronic condition and with at least one chronic conditions at baseline.

| SCOPE Target Chronic Conditions                             | Identified Prior to or during the Study | Intervention Group<br>( <i>n</i> = 164), % | Control Group<br>( <i>n</i> = 214), % |
|-------------------------------------------------------------|-----------------------------------------|--------------------------------------------|---------------------------------------|
| Hypertension only                                           | Prior to the study                      | 99 (60.4)                                  | 123 (57.5)                            |
|                                                             | During the study                        | 26 (15.9)                                  | 46 (21.5)                             |
| Diabetes only                                               | Prior to the study                      | 38 (23.2)                                  | 49 (22.9)                             |
|                                                             | During the study                        | 17 (10.4)                                  | 19 (8.9)                              |
| COPD only                                                   | Prior to the study                      | 12 (7.3)                                   | 10 (4.7)                              |
|                                                             | During the study                        | 110 (67.1)                                 | 132 (61.7)                            |
| Had at least one or more of hypertension, diabetes and COPD | Combined                                | 157 (97.5)*                                | 203 (96.7%)**                         |

Footnotes: Participants identified prior to the study was by self-report of having the condition or by self-report of medication intake; participants identified during the study was by baseline biomarker measurements; combined = by both self-report and biomarker measurements \* = 3 participants with readings missing, \*\* = 4 participants with readings missing.

**Table S2.** Unadjusted models for physiological and functional measures.

| Laboratory Measures<br>(units)     | Time-<br>Points | Intervention<br>Mean $\pm$ SE (N) | Control<br>Mean $\pm$ SE (N)   | p-Value             |
|------------------------------------|-----------------|-----------------------------------|--------------------------------|---------------------|
| HbA1C<br>(%)                       | Baseline        | 6.48 $\pm$ 1.29 (N=163)           | 6.46 $\pm$ 1.20 (N=214)        | Reference           |
|                                    | 10-month        | 6.40 $\pm$ 1.21 (N=131)           | 6.35 $\pm$ 1.20 (N=152)        | 0.734               |
|                                    | 18-month        | 6.42 $\pm$ 1.21 (N=120)           | 6.40 $\pm$ 1.20 (N=138)        | 0.948               |
| Vitamin B12<br>(pmol/L)            | Baseline        | 301.03 $\pm$ 205.46<br>(N=164)    | 306.81 $\pm$ 158.24<br>(N=214) | Reference           |
|                                    | 10-month        | 351.63 $\pm$ 211.91<br>(N=132)    | 340.49 $\pm$ 182.03<br>(N=152) | 0.605               |
|                                    | 18-month        | 410.03 $\pm$ 223.84<br>(N=120)    | 345.22 $\pm$ 136.96<br>(N=138) | <b>0.001**</b>      |
| Hemoglobin concentration<br>(g/dL) | Baseline        | 13.11 $\pm$ 1.51 (N=163)          | 13.30 $\pm$ 1.30 (N=214)       | Reference           |
|                                    | 10-month        | 13.31 $\pm$ 1.40 (N=132)          | 13.41 $\pm$ 1.30 (N=152)       | <b>0.002**</b>      |
|                                    | 18-month        | 13.12 $\pm$ 1.39 (N=120)          | 13.42 $\pm$ 1.32 (N=138)       | 0.846               |
| MCV<br>(fl)                        | Baseline        | 90.65 $\pm$ 5.78 (N=163)          | 89.67 $\pm$ 6.27 (N=214)       | Reference           |
|                                    | 10-month        | 90.74 $\pm$ 5.38 (N=132)          | 89.99 $\pm$ 6.59 (N=152)       | <b>0.005**</b>      |
|                                    | 18-month        | 90.32 $\pm$ 5.18 (N=120)          | 89.17 $\pm$ 6.42 (N=138)       | 0.280               |
| Platelets<br>( $\times 10^9/L$ )   | Baseline        | 250.14 $\pm$ 59.45 (N=214)        | 254.37 $\pm$ 67.88<br>(N=214)  | Reference           |
|                                    | 10-month        | 252.98 $\pm$ 60.34 (N=132)        | 260.63 $\pm$ 68.43<br>(N=152)  | 0.298               |
|                                    | 18-month        | 264.60 $\pm$ 64.00 (N=120)        | 268.54 $\pm$ 82.53<br>(N=138)  | 0.945               |
| WBC count<br>( $\times 10^9/L$ )   | Baseline        | 6.68 $\pm$ 1.76 (N=163)           | 6.65 $\pm$ 1.66 (N=214)        | Reference           |
|                                    | 10-month        | 6.80 $\pm$ 1.62 (N=132)           | 6.79 $\pm$ 1.72 (N=152)        | 0.455               |
|                                    | 18-month        | 6.79 $\pm$ 1.63 (N=120)           | 6.80 $\pm$ 1.61 (N=138)        | 0.920               |
| Total Cholesterol (mmol/L)         | Baseline        | 4.96 $\pm$ 1.02 (N=164)           | 5.07 $\pm$ 1.02 (N=214)        | Reference           |
|                                    | 10-month        | 4.91 $\pm$ 1.06 (N=132)           | 5.05 $\pm$ 1.09 (N=152)        | 0.506               |
|                                    | 18-month        | 4.88 $\pm$ 0.97 (N=120)           | 5.01 $\pm$ 1.03 (N=138)        | 0.832               |
| HDL Cholesterol<br>(mmol/L)        | Baseline        | 1.54 $\pm$ 0.43 (N=164)           | 1.48 $\pm$ 0.35 (N=214)        | Reference           |
|                                    | 10-month        | 1.51 $\pm$ 0.41 (N=132)           | 1.53 $\pm$ 0.40 (N=152)        | <b>&lt;0.001***</b> |
|                                    | 18-month        | 1.53 $\pm$ 0.44 (N=120)           | 1.47 $\pm$ 0.35 (N=138)        | 0.857               |
| LDL Cholesterol<br>(mmol/L)        | Baseline        | 2.79 $\pm$ 0.84 (N=163)           | 2.95 $\pm$ 0.93 (N=213)        | Reference           |
|                                    | 10-month        | 2.79 $\pm$ 0.87 (N=131)           | 2.87 $\pm$ 0.93 (N=151)        | 0.456               |

|                                                         |          |                          |                          |                |
|---------------------------------------------------------|----------|--------------------------|--------------------------|----------------|
|                                                         | 18-month | 2.73±0.77 (N=119)        | 2.91±0.89 (N=138)        | 0.758          |
| Total Cholesterol/ HDL Cholesterol<br>(mmol/L)          | Baseline | 3.41±0.96 (N=164)        | 3.59±1.00 (N=214)        | Reference      |
|                                                         | 10-month | 3.43±1.08 (N=132)        | 4.43±0.87 (N=152)        | <b>0.003**</b> |
|                                                         | 18-month | 3.36±0.98 (N=120)        | 3.53±0.91 (N=138)        | 0.967          |
| Triglycerides<br>(mmol/L)                               | Baseline | 1.38±0.70 (N=164)        | 1.44±0.78 (N=214)        | Reference      |
|                                                         | 10-month | 1.37±0.83 (N=132)        | 1.44±0.72 (N=152)        | 0.547          |
|                                                         | 18-month | 1.37±0.85 (N=120)        | 1.38±0.57 (N=138)        | 0.591          |
| Albumin<br>(g/L)                                        | Baseline | 42.60±2.59 (N=164)       | 43.44±2.34 (N=214)       | Reference      |
|                                                         | 10-month | 43.65±2.43 (N=132)       | 44.31±2.55 (N=152)       | 0.755          |
|                                                         | 18-month | 41.94±2.38 (N=120)       | 42.76±2.55 (N=138)       | 0.936          |
| Creatinine<br>(umol/L)                                  | Baseline | 79.79±46.81 (N=164)      | 75.43±30.20 (N=214)      | Reference      |
|                                                         | 10-month | 87.00±75.56 (N=132)      | 83.77±38.18 (N=152)      | <b>0.035*</b>  |
|                                                         | 18-month | 80.26±55.26(N=120)       | 72.70±26.29 (N=138)      | 0.838          |
| Urine microalbumin to creatinine ratio (ACR)<br>(mg/dL) | Baseline | 0.84±0.23 (N=164)        | 0.84±0.28 (N=214)        | Reference      |
|                                                         | 10-month | 0.99±2.45 (N=132)        | 0.76±1.84 (N=152)        | 0.279          |
|                                                         | 18-month | 1.15±2.21 (N=122)        | 0.87±2.24 (N=137)        | 0.235          |
| Blood pressure -Systolic<br>(mmHg)                      |          |                          | 141.85±19.44<br>(N=214)  |                |
|                                                         | Baseline | 140.18±02.24 (N=164)     | 140.53±18.08             | Reference      |
|                                                         | 10-month | 143.78±21.18 (N=132)     | (N=152)                  | 0.130          |
|                                                         | 18-month | 139.98±19.25 (N=122)     | 136.61±17.79<br>(N=137)  | 0.081          |
| Blood pressure -Diastolic<br>(mmHg)                     | Baseline | 77.88±12.38 (N=164)      | 78.14±11.97 (N=214)      | Reference      |
|                                                         | 10-month | 78.68±10.46 (N=132)      | 78.12±9.57 (N=152)       | 0.824          |
|                                                         | 18-month | 77.52±10.93 (N=122)      | 76.30±10.21 (N=137)      | 0.292          |
| Pulse<br>(BPM)                                          | Baseline | 70.61±11.83 (N=164)      | 71.06±11.92 (N=210)      | Reference      |
|                                                         | 10-month | 70.48±10.46 (N=132)      | 71.21±10.99 (N=151)      | 0.929          |
|                                                         | 18-month | 71.58±11.58 (N=122)      | 71.61±11.78 (N=136)      | 0.371          |
| Peak expiratory flow reading<br>(L/min)                 |          |                          | 225.25±92.04<br>(N=214)  |                |
|                                                         | Baseline | 230.25±95.13 (N=163)     | (N=214)                  | Reference      |
|                                                         | 10-month | 244.18±96.43 (N=130)     | 263.08±101.46<br>(N=152) | 0.303          |
|                                                         | 18-month | 243.43±104.52<br>(N=118) | 255.61±122.66<br>(N=134) | 0.439          |
| BMI (kg/m2)                                             | Baseline | 24.13±4.73 (N=163)       | 24.52±4.98 (N=210)       | Reference      |
|                                                         | 10-month | 24.56±4.66 (N=128)       | 24.55±4.87 (N=143)       | 0.312          |

|                                                            |          |                       |                       |                                     |
|------------------------------------------------------------|----------|-----------------------|-----------------------|-------------------------------------|
|                                                            | 18-month | 24.34±4.52 (N=117)    | 25.38±13.49 (N=133)   | 0.392                               |
| Weight circumference (cm)                                  | Baseline | 88.28±12.68 (N=164)   | 87.88±12.44 (N=214)   | Reference<br><b>0.023*</b><br>0.880 |
|                                                            | 10-month | 95.38±80.30 (N=131)   | 124.73±178.19 (N=152) |                                     |
|                                                            | 18-month | 118.50±163.22 (N=122) | 128.28±187.37 (N=137) |                                     |
| Time for completing chair-stand test (seconds)             | Baseline | 13.39±4.55 (N=150)    | 11.78±3.90 (N=194)    | Reference                           |
|                                                            | 10-month | 10.86±2.23 (N=121)    | 11.79±3.94 (N=144)    | <b>&lt;0.001***</b>                 |
|                                                            | 18-month | 10.66±3.61 (N=110)    | 11.56±4.53 (N=128)    | <b>&lt;0.001***</b>                 |
| Difference in oxygen saturation after chair-stand test (%) | Baseline | -0.46±1.62 (N=150)    | 0.10±1.33 (N=195)     | Reference                           |
|                                                            | 10-month | -0.26±1.59 (N=121)    | -0.33±1.34 (N=144)    | 0.068                               |
|                                                            | 18-month | -0.26±1.59 (N=110)    | -0.41±1.27 (N=128)    | <b>0.007**</b>                      |
| Difference in heart rate after chair-stand test (BPM)      | Baseline | 9.93±7.99 (N=150)     | 10.51±6.32 (N=195)    | Reference                           |
|                                                            | 10-month | 11.64±6.92 (N=121)    | 9.50±6.74 (N=144)     | 0.054                               |
|                                                            | 18-month | 9.61±6.87 (N=110)     | 10.71±8.03 (N=128)    | 0.532                               |
| Hand grip strength (kg)                                    | Baseline | 20.98±6.79 (N=155)    | 19.77±6.32 (N=203)    | Reference                           |
|                                                            | 10-month | 22.66±7.33 (N=126)    | 22.34±7.59 (N=150)    | 0.290                               |
|                                                            | 18-month | 21.69±5.83 (N=111)    | 21.38±7.26 (N=142)    | 0.122                               |
| iADL                                                       | Baseline | 0.330±0.08 (N=164)    | 0.33±0.07 (N=214)     | Reference                           |
|                                                            | 10-month | 0.28±0.08 (N=137)     | 0.30±0.07 (N=185)     | 0.852                               |
|                                                            | 18-month | 0.47±0.09 (N=130)     | 0.32±0.08 (N=162)     | 0.304                               |
| SRH                                                        | Baseline | 78.72±27.98 (N=164)   | 77.39±24.50 (N=214)   | Reference                           |
|                                                            | 10-month | 73.16±29.53 (N=137)   | 65.27±25.57 (N=214)   | 0.845                               |
|                                                            | 18-month | 72.34±30.64 (N=130)   | 14.20±27.04 (N=214)   | 0.194                               |

Footnotes: HbA1C: hemoglobin A1c; MCV: Mean corpuscular volume; HDL: high-density lipoprotein, LDL: low-density lipoprotein, RBC: red blood cell, WBC: white blood cell, ACR: albumin to creatinine ratio; BMI: body-mass index; BPM= beats per minute; iADL: independent activities of daily living; SRH: self-rated health; \*  $p \leq 0.05$ , \*\*  $p \leq 0.01$ , \*\*\*  $p \leq 0.001$ .

**Table S3.** Non-responder analyses of the composite measure for participants retained versus loss to follow up.

a. Gender difference, 10-month

| Control or Intervention |        | Participants Retained or Loss to Follow-Up          |          | Total  | p-Value |
|-------------------------|--------|-----------------------------------------------------|----------|--------|---------|
|                         |        | Loss to follow-up                                   | Retained |        |         |
| Control                 | Gender | Count                                               | 19       | 48     | 67      |
|                         |        | % within Gender                                     | 28.4%    | 71.6%  | 100.0%  |
|                         |        | % within Participants retained or loss to follow-up | 26.8%    | 33.6%  | 31.3%   |
|                         |        | % of Total                                          | 8.9%     | 22.4%  | 31.3%   |
|                         | Female | Count                                               | 52       | 95     | 147     |
|                         |        | % within Gender                                     | 35.4%    | 64.6%  | 100.0%  |
|                         |        | % within Participants retained or loss to follow-up | 73.2%    | 66.4%  | 68.7%   |
|                         |        | % of Total                                          | 24.3%    | 44.4%  | 68.7%   |
|                         | Total  | Count                                               | 71       | 143    | 214     |
|                         |        | % within Gender                                     | 33.2%    | 66.8%  | 100.0%  |
|                         |        | % within Participants retained or loss to follow-up | 100.0%   | 100.0% | 100.0%  |
|                         |        | % of Total                                          | 33.2%    | 66.8%  | 100.0%  |
| Intervention            | Gender | Count                                               | 23       | 37     | 60      |
|                         |        | % within Gender                                     | 38.3%    | 61.7%  | 100.0%  |
|                         |        | % within Participants retained or loss to follow-up | 56.1%    | 30.1%  | 36.6%   |
|                         |        | % of Total                                          | 14.0%    | 22.6%  | 36.6%   |
|                         | Female | Count                                               | 18       | 86     | 104     |
|                         |        | % within Gender                                     | 17.3%    | 82.7%  | 100.0%  |
|                         |        | % within Participants retained or loss to follow-up | 43.9%    | 69.9%  | 63.4%   |
|                         |        | % of Total                                          | 11.0%    | 52.4%  | 63.4%   |
|                         | Total  | Count                                               | 41       | 123    | 164     |
|                         |        | % within Gender                                     | 25.0%    | 75.0%  | 100.0%  |
|                         |        | % within Participants retained or loss to follow-up | 100.0%   | 100.0% | 100.0%  |
|                         |        | % of Total                                          | 25.0%    | 75.0%  | 100.0%  |

b. Gender difference, 18-month

| Control or Intervention |        | Participants Retained or Loss to Follow-Up          |          |        | Total  | p-Value |
|-------------------------|--------|-----------------------------------------------------|----------|--------|--------|---------|
|                         |        | Loss to Follow-Up                                   | Retained |        |        |         |
| Control                 | Gender | Count                                               | 29       | 38     | 67     | 1.000   |
|                         |        | % within Gender                                     | 43.3%    | 56.7%  | 100.0% |         |
|                         |        | % within Participants retained or loss to follow-up | 31.2%    | 31.4%  | 31.3%  |         |
|                         |        | % of Total                                          | 13.6%    | 17.8%  | 31.3%  |         |
|                         |        | Count                                               | 64       | 83     | 147    |         |
|                         |        | % within Gender                                     | 43.5%    | 56.5%  | 100.0% |         |
|                         | Female | % within Participants retained or loss to follow-up | 68.8%    | 68.6%  | 68.7%  |         |
|                         |        | % of Total                                          | 29.9%    | 38.8%  | 68.7%  |         |
|                         |        | Count                                               | 93       | 121    | 214    |         |
|                         | Total  | % within Gender                                     | 43.5%    | 56.5%  | 100.0% |         |
|                         |        | % within Participants retained or loss to follow-up | 100.0%   | 100.0% | 100.0% |         |
|                         |        | % of Total                                          | 43.5%    | 56.5%  | 100.0% |         |
| Intervention            | Gender | Count                                               | 28       | 32     | 60     |         |
|                         |        | % within Gender                                     | 46.7%    | 53.3%  | 100.0% |         |
|                         |        | % within Participants retained or loss to follow-up | 50.0%    | 29.6%  | 36.6%  |         |
|                         |        | % of Total                                          | 17.1%    | 19.5%  | 36.6%  |         |
|                         |        | Count                                               | 28       | 76     | 104    |         |
|                         |        | % within Gender                                     | 26.9%    | 73.1%  | 100.0% |         |
|                         | Female | % within Participants retained or loss to follow-up | 50.0%    | 70.4%  | 63.4%  | *0.011  |
|                         |        | % of Total                                          | 17.1%    | 46.3%  | 63.4%  |         |
|                         |        | Count                                               | 56       | 108    | 164    |         |
|                         | Total  | % within Gender                                     | 34.1%    | 65.9%  | 100.0% |         |
|                         |        | % within Participants retained or loss to follow-up | 100.0%   | 100.0% | 100.0% |         |
|                         |        | % of Total                                          | 34.1%    | 65.9%  | 100.0% |         |

c. Marital Status difference, 10-month

| Control or Intervention |                | Participants Retained Or Loss To Follow-Up          |          | Total  |        |
|-------------------------|----------------|-----------------------------------------------------|----------|--------|--------|
|                         |                | Loss to Follow-Up                                   | Retained |        |        |
| Control                 | Marital Status | Count                                               | 36       | 41     | 77     |
|                         |                | % within Marital Status: Married                    | 46.8%    | 53.2%  | 100.0% |
|                         |                | % within Participants retained or loss to follow-up | 50.7%    | 28.7%  | 36.0%  |
|                         |                | % of Total                                          | 16.8%    | 19.2%  | 36.0%  |
|                         | Unmarried      | Count                                               | 35       | 102    | 137    |
|                         |                | % within Marital Status: Married                    | 25.5%    | 74.5%  | 100.0% |
|                         |                | % within Participants retained or loss to follow-up | 49.3%    | 71.3%  | 64.0%  |
|                         |                | % of Total                                          | 16.4%    | 47.7%  | 64.0%  |
|                         | Married        | Count                                               | 71       | 143    | 214    |
|                         |                | % within Marital Status: Married                    | 33.2%    | 66.8%  | 100.0% |
|                         |                | % within Participants retained or loss to follow-up | 100.0%   | 100.0% | 100.0% |
|                         |                | % of Total                                          | 33.2%    | 66.8%  | 100.0% |
| Intervention            | Marital Status | Count                                               | 28       | 64     | 92     |
|                         |                | % within Marital Status: Married                    | 30.4%    | 69.6%  | 100.0% |
|                         |                | % within Participants retained or loss to follow-up | 68.3%    | 52.0%  | 56.1%  |
|                         |                | % of Total                                          | 17.1%    | 39.0%  | 56.1%  |
|                         | Unmarried      | Count                                               | 13       | 59     | 72     |
|                         |                | % within Marital Status: Married                    | 18.1%    | 81.9%  | 100.0% |
|                         |                | % within Participants retained or loss to follow-up | 31.7%    | 48.0%  | 43.9%  |
|                         |                | % of Total                                          | 7.9%     | 36.0%  | 43.9%  |
|                         | Married        | Count                                               | 41       | 123    | 164    |
|                         |                | % within Marital Status: Married                    | 18.1%    | 81.9%  | 100.0% |
|                         |                | % within Participants retained or loss to follow-up | 31.7%    | 48.0%  | 43.9%  |
|                         |                | % of Total                                          | 7.9%     | 36.0%  | 43.9%  |

**\*\*0.002**

0.101



|  |                                                        |        |        |        |
|--|--------------------------------------------------------|--------|--------|--------|
|  | % within<br>Marital Status: Married                    | 25.0%  | 75.0%  | 100.0% |
|  | % within Participants retained<br>or loss to follow-up | 100.0% | 100.0% | 100.0% |
|  | % of Total                                             | 25.0%  | 75.0%  | 100.0% |

d. Marital Status difference, 18-month

| Control or Intervention |                | Participants Retained or Loss to<br>Follow-Up          |          | Total  |        |
|-------------------------|----------------|--------------------------------------------------------|----------|--------|--------|
|                         |                | Loss to Follow-<br>Up                                  | Retained |        |        |
| Control                 | Marital Status | Count                                                  | 45       | 32     | 77     |
|                         |                | % within<br>Marital Status: Married                    | 58.4%    | 41.6%  | 100.0% |
|                         |                | % within Participants retained<br>or loss to follow-up | 48.4%    | 26.4%  | 36.0%  |
|                         |                | % of Total                                             | 21.0%    | 15.0%  | 36.0%  |
|                         |                | Count                                                  | 48       | 89     | 137    |
|                         |                | % within<br>Marital Status: Married                    | 35.0%    | 65.0%  | 100.0% |
|                         |                | % within Participants retained<br>or loss to follow-up | 51.6%    | 73.6%  | 64.0%  |
|                         |                | % of Total                                             | 22.4%    | 41.6%  | 64.0%  |
|                         |                | Count                                                  | 93       | 121    | 214    |
|                         |                | % within<br>Marital Status: Married                    | 43.5%    | 56.5%  | 100.0% |
|                         |                | % within Participants retained<br>or loss to follow-up | 100.0%   | 100.0% | 100.0% |
|                         |                | % of Total                                             | 43.5%    | 56.5%  | 100.0% |
| Intervention            | Marital Status | Count                                                  | 36       | 56     | 92     |
|                         |                | % within<br>Marital Status: Married                    | 39.1%    | 60.9%  | 100.0% |
|                         |                | % within Participants retained<br>or loss to follow-up | 64.3%    | 51.9%  | 56.1%  |
|                         |                | % of Total                                             | 22.0%    | 34.1%  | 56.1%  |
|                         |                | Count                                                  | 20       | 52     | 72     |
|                         |                |                                                        |          |        |        |

|       |                                                     |        |        |        |
|-------|-----------------------------------------------------|--------|--------|--------|
| Total | % within Marital Status: Married                    | 27.8%  | 72.2%  | 100.0% |
|       | % within Participants retained or loss to follow-up | 35.7%  | 48.1%  | 43.9%  |
|       | % of Total                                          | 12.2%  | 31.7%  | 43.9%  |
|       | Count                                               | 56     | 108    | 164    |
|       | % within Marital Status: Married                    | 34.1%  | 65.9%  | 100.0% |
|       | % within Participants retained or loss to follow-up | 100.0% | 100.0% | 100.0% |
|       | % of Total                                          | 34.1%  | 65.9%  | 100.0% |

Footnotes: \*\*\* denotes  $p < 0.001$ , \*\* denotes  $p < 0.01$ , \* denotes  $p < 0.05$ .

**Table S4.** Statistical models for changes in medication intakes and lifestyle measures across intervention time-points.

| Measures                                                             | Time-points | Intervention ( $N = 164$ )<br>Mean $\pm$ SE or<br>$n$ (%) | 95% CI         | Control ( $N = 214$ )<br>Mean $\pm$ SE or<br>$n$ (%) | 95% CI      | Estimate (SE) | 95% CI        | $t$       | $p$ -Value |
|----------------------------------------------------------------------|-------------|-----------------------------------------------------------|----------------|------------------------------------------------------|-------------|---------------|---------------|-----------|------------|
| Total number of medications taken                                    | Baseline    | 1.84 (0.12)                                               | 1.594 to 2.077 | 1.83 (0.11)                                          | 1.616-2.038 | Reference     | Reference     | Reference | Reference  |
|                                                                      | 10-month    | 1.71 (0.12)                                               | 1.466 to 1.949 | 1.68 (0.11)                                          | 1.471-1.894 | -0.02         | -0.32 to 0.28 | -0.11     | 0.28       |
|                                                                      | 18-month    | 1.89 (0.12)                                               | 1.637 to 2.120 | 1.80 (0.11)                                          | 1.592-2.015 | -0.07         | -0.36 to 0.24 | -0.43     | 0.24       |
| Intake of medication for hypertension                                | Baseline    | 97 (59.1)                                                 |                | 123 (57.5)                                           |             | Reference     |               |           | Reference  |
|                                                                      | 10-month    | 83 (50.6)                                                 | NA             | 109 (50.9)                                           | NA          | -0.08         | NA            | NA        | 0.78       |
|                                                                      | 18-month    | 86 (52.4)                                                 |                | 101 (47.2)                                           |             | 0.14          |               |           | 0.63       |
| Intake of medication for diabetes                                    | Baseline    | 38 (23.2)                                                 |                | 48 (22.4)                                            |             | Reference     |               |           | Reference  |
|                                                                      | 10-month    | 32 (19.5)                                                 | NA             | 43 (20.1)                                            | NA          | -0.08         | NA            | NA        | 0.83       |
|                                                                      | 18-month    | 8 (4.9)                                                   |                | 6 (2.8)                                              |             | 0.15          |               |           | 0.68       |
| Intake of medication for COPD & other chronic respiratory conditions | Baseline    | 10 (6.1)                                                  |                | 9 (4.2)                                              |             | Reference     |               |           | Reference  |
|                                                                      | 10-month    | 7 (4.3)                                                   | NA             | 9 (4.2)                                              | NA          | -0.38         | NA            | NA        | 0.59       |
|                                                                      | 18-month    | 0 (0)                                                     |                | 0 (0)                                                |             | 0.18          |               |           | 0.80       |
| Smoking status                                                       | Baseline    | 19 (11.6)                                                 |                | 16 (7.5)                                             |             | Reference     |               |           | Reference  |
|                                                                      | 10-month    | 13 (7.9)                                                  | NA             | 12 (5.6)                                             | NA          | -0.07         | NA            | NA        | 0.898      |
|                                                                      | 18-month    | 15 (9.1)                                                  |                | 12 (5.6)                                             |             | 0.01          |               |           | 0.992      |
| Physical activities                                                  | Baseline    | 4.22 (0.21)                                               | 3.80 to        | 2.79 (0.19)                                          | 2.43 to     | Reference     | Reference     | Reference | Reference  |

|  |          |             |                                    |             |                                    |           |                         |           |                     |
|--|----------|-------------|------------------------------------|-------------|------------------------------------|-----------|-------------------------|-----------|---------------------|
|  | 10-month | 4.42 (0.23) | 4.64                               | 3.54 (0.20) | 3.16                               | 0.55      | -0.09 to                | 1.68      | 0.09                |
|  | 18-month | 3.89 (0.24) | 3.96 to<br>4.87<br>3.40 to<br>4.33 | 3.91 (0.21) | 3.15 to<br>3.93<br>3.49 to<br>4.32 | 1.47      | 1.19<br>0.80 to<br>2.13 | 4.32      | <b>&lt;0.001***</b> |
|  |          |             | 5.57 to<br>6.24                    |             | 5.62 to<br>6.21                    |           | Reference<br>-0.37 to   |           |                     |
|  | Baseline | 5.90 (0.17) | 5.89 to                            | 5.92 (0.15) | 6.26 to                            | Reference | 1.00                    | Reference | Reference           |
|  | 10-month | 6.25 (0.19) | 6.62                               | 6.58 (0.16) | 6.90                               | 0.32      | -1.55 to -              | 0.91      | 0.36                |
|  | 18-month | 7.58 (0.19) | 7.20 to<br>7.96                    | 6.75 (0.17) | 6.41 to<br>7.09                    | -0.84     | 0.14                    | -2.36     | <b>0.02*</b>        |

Footnotes: NA= not applicable; We measured the levels of physical activity by asking three questions: during the past week, even if it was not a typical week for you, how much total time did you spend on each of the following? 1) Stretching or strengthening exercises (Taiji, Qigong, range of motion, using weights, etc.), 2) Walk for exercise purposes, and 3) Participate in vigorous exercise (e.g. jogging, swimming, keep fit or dancing class, etc.). The participants rated the frequencies by which they participated in the three activities on a 5-point scale, ranging from 0 to 4, with a sum of 12. The higher score indicated higher levels of physical activity; We measured the levels of social activity by asking three questions: during the past week, how much total time did you spend on each of the following? 1) Stretching or strengthening exercises (Taiji, Qigong, range of motion, using weights, etc.), 2) Walk for exercise purposes, and 3) Participate in vigorous exercise (e.g. jogging, swimming, keep fit or dancing class, etc.). The participants rated the frequencies by which they participated in the three activities on a 5-point scale, ranging from 0 to 4, with a sum of 12. The higher score indicated higher levels of social activity; \*  $p \leq 0.05$ , \*\*  $p \leq 0.01$ , \*\*\*  $p \leq 0.001$ .
